# Supplementary material for: The impact of future climate projections and anthropogenic activities on basin-scale groundwater availability
Source: Copernicus journal article supplement (doi:10.5194/hess-2024-26), 2024-02-28

(a) Unconfined\_2030

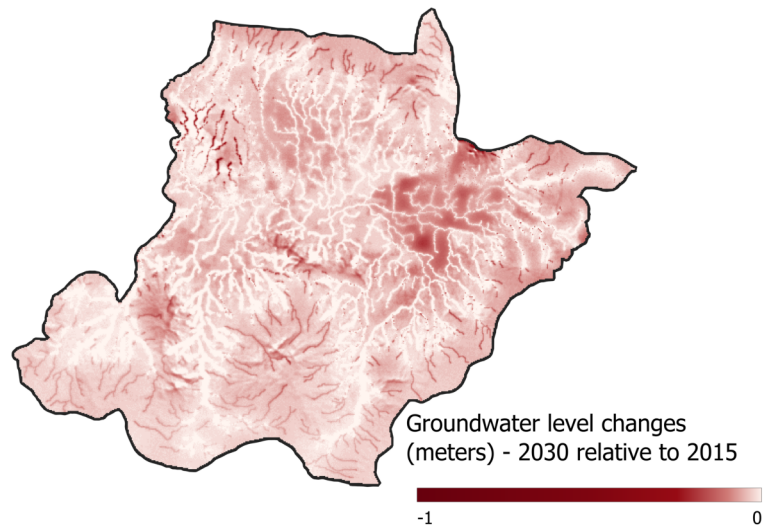

(b) Unconfined\_2050

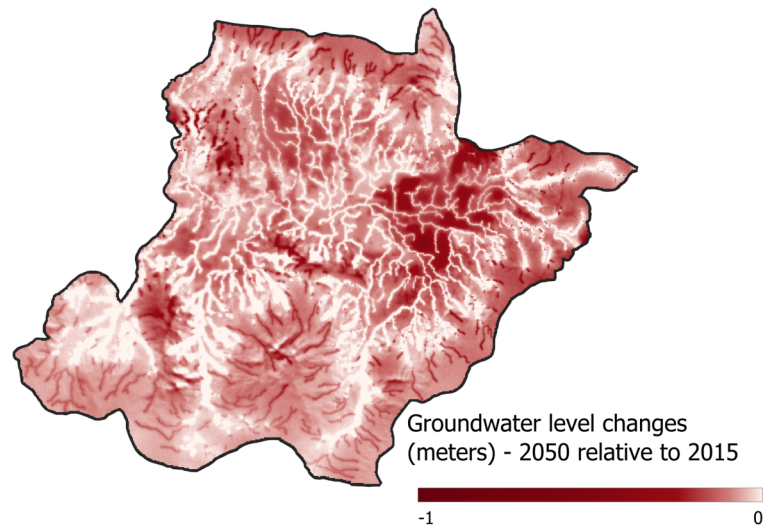

(c) Unconfined\_2100

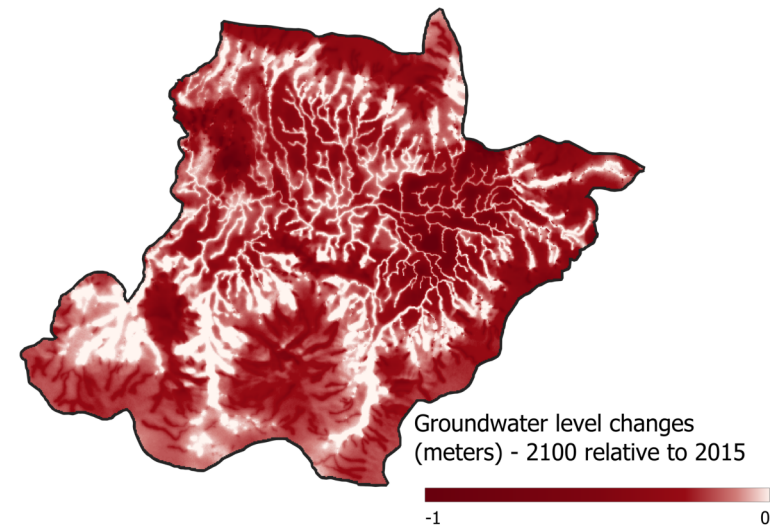

(d) Confined\_2030

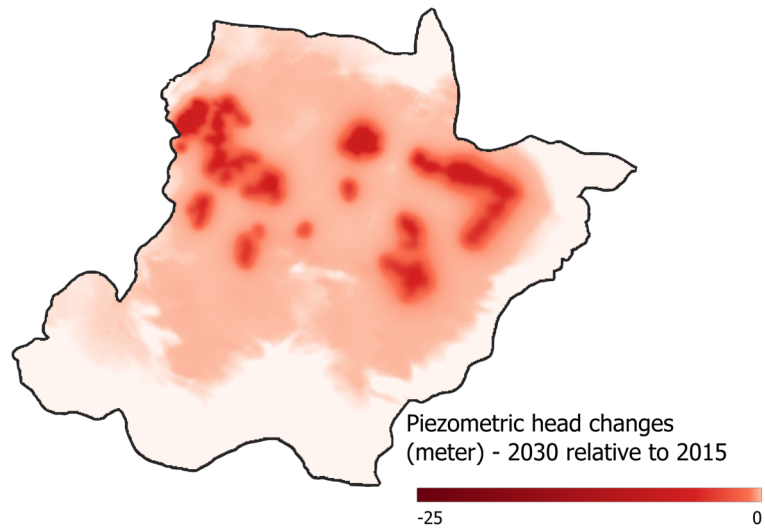

(e) Confined\_2050

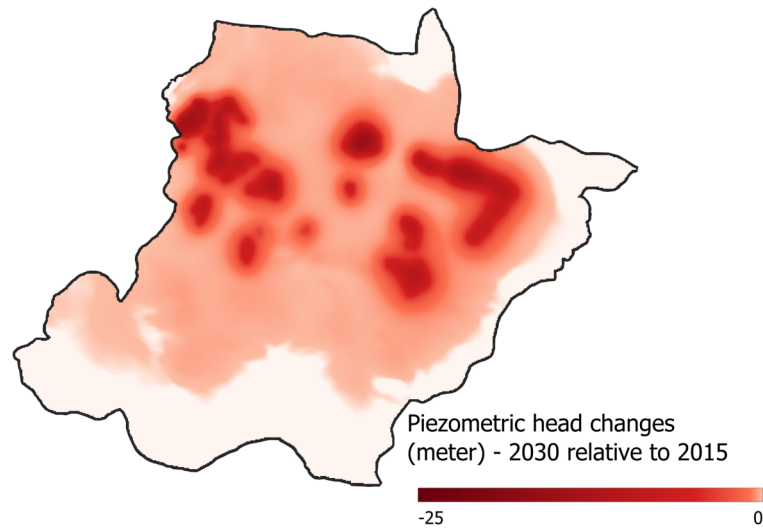

(f) Confined\_2100

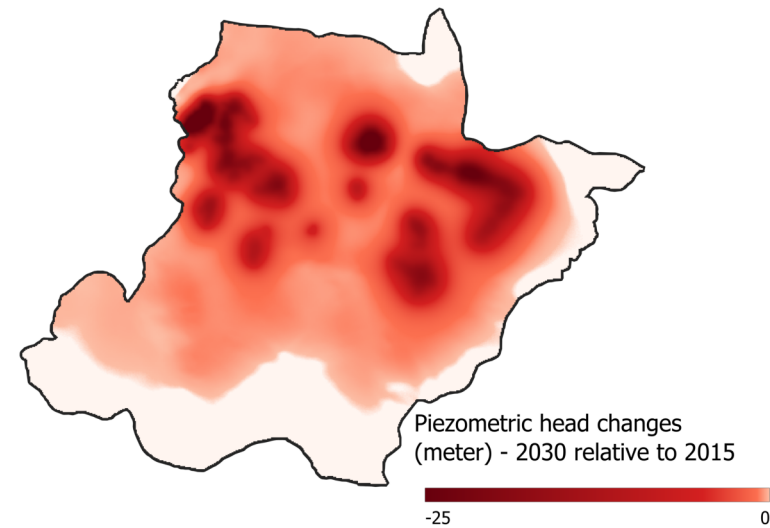

Supplement: Supplementary file [file hess-2024-26-AC1-supplement.zip]
