# Supplementary material for: The impact of future climate projections and anthropogenic activities on basin-scale groundwater availability
Source: Copernicus journal article supplement (doi:10.5194/hess-2024-26), 2024-02-28

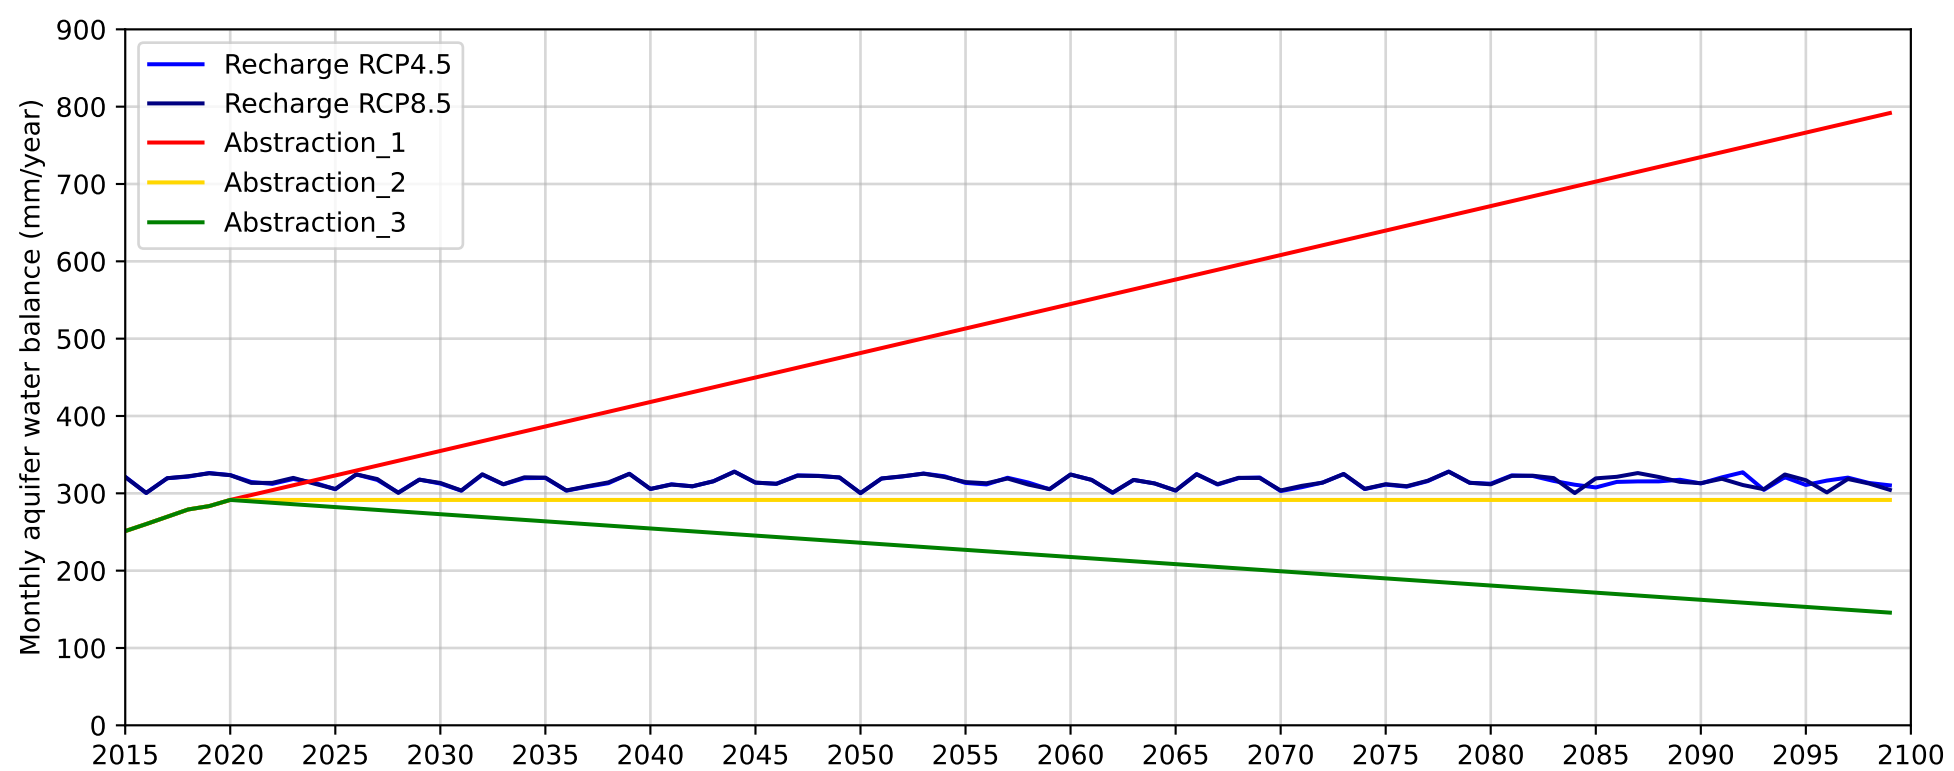

Supplement: Supplementary file [file hess-2024-26-AC1-supplement.zip]
